# Supplementary material for: Comparative analysis of HPV16 gene expression profiles in cervical and in oropharyngeal squamous cell carcinoma
Source: PubMed Central journal article supplement (PMC5470952; doi:10.18632/oncotarget.15977), 2017-03-07
Supplement: oncotarget-08-34070-s001.pdf [file oncotarget-08-34070-s001.pdf]

## Comparative analysis of HPV16 gene expression profiles in cervical and in oropharyngeal squamous cell carcinoma

### Supplementary Material

**Supplementary Table:** PCR primers sequences used to amplify HPV16 cDNA ORFs, GAPDH cDNA and to exclude HPV16 genomic DNA contamination in cDNA samples.

| Locus         | Primers name    | Sequences (5'-3')         | Nucleotide Position (5') | Amplicon Size (bp) | Ta (°C) | References                 |
|---------------|-----------------|---------------------------|--------------------------|--------------------|---------|----------------------------|
| ORFE2         | HPV16E2F        | AAGGACGGATTAAGTGTAA       | 3,581                    | 201 bp             | 54.3    | This study                 |
|               | HPV16E2R        | GTTGCCATTCATATCATAT       | 3,781                    |                    |         |                            |
| ORFE4         | HPV16E4F        | CACACCACTAAGTTGTTG        | 3,508                    | 92 bp              | 55.0    | This study                 |
|               | HPV16E4R        | TTACAGTTAATCCGCCTT        | 3,599                    |                    |         |                            |
| ORFE5         | HPV16E5F        | GCATCCACAACATTACTG        | 3,867                    | 135 bp             | 55.3    | This study                 |
|               | HPV16E5R        | TATCCACAATACTAATACCAATAG  | 4,000                    |                    |         |                            |
| ORFE6         | HPV16RNAF1F2    | AAGTTACCACAGTTATGC        | 134                      | 239 bp             | 54.5    | This study                 |
|               | HPV16RNAR1      | TGTTCTAATGTTGTTCCAT       | 372                      |                    |         |                            |
| ORFE6*I       | HPV16E6sI-IIFor | AGGAGCGACCCAGAAAGTTA      | 120                      | 107 bp             | 50.0    | Pastuszak-Lewandoska, 2014 |
|               | HPV16E6sIRev    | GCTTTTGACAGTTAATACACCTCAC | 428                      |                    |         |                            |
| ORFE6*II      | HPV16E6sI-IIFor | AGGAGCGACCCAGAAAGTTA      | 120                      | 123 bp             | 50.0    | Pastuszak-Lewandoska, 2014 |
|               | HPV16E6sIRev    | TACGTGTTCTTATGATCTCAGGTC  | 542                      |                    |         |                            |
| ORFE7         | HPV16E7F        | ACAGAGCCCATTACAATA        | 704                      | 110 bp             | 54.3    | This study                 |
|               | HPV16E7R        | CATTAAACAGGTCTTCCAA       | 813                      |                    |         |                            |
| ORFL1         | HPV16L1F        | GCACGGATGAATATGTTG        | 5,704                    | 223 bp             | 55.3    | This study                 |
|               | HPV16L1R        | CGCTGTGTATCTGGATTA        | 5,926                    |                    |         |                            |
| ORFL2         | HPV16L2F        | ATAGTCGCACAACACAAC        | 4,917                    | 92 bp              | 55.0    | This study                 |
|               | HPV16L2R        | ATTATCCACATCTATACCTTCAT   | 5,026                    |                    |         |                            |
| HPV DNA (P97) | HPV16DNAF2      | TAGTCATACATTGTTTCAT       | 7,811                    | 391 bp             | 54.5    | This study                 |
|               | HPV16DNAR1R2    | TTATCACATACAGCATAT        | 297                      |                    |         |                            |
| GAPDH         | GAPDHs          | TTTAACTCTGGTAAAGTG        | 170                      | 149 bp             | 45.0    | This study                 |
|               | GAPDHs          | ATTTCCATTGATGACAAG        | 319                      |                    |         |                            |

Nucleotide positions of primers used for HPV16 genes amplifications are given on the GenBank sequence number K02718.1. Nucleotide positions of primers used for GAPDH amplifications are given on the GenBank sequence number AF261085.1.
